# Tracking the mind's eye: Primate gaze behavior during virtual visuomotor navigation reflects belief dynamics

Kaushik J Lakshminarasimhan<sup>1,#</sup>, Eric Avila<sup>1,#</sup>, Erin Neyhart<sup>2</sup>, Gregory C DeAngelis<sup>3</sup>, Xaq Pitkow<sup>2,4</sup>, Dora E Angelaki<sup>1</sup>

<sup>1</sup>Center for Neural Science, New York University, New York, NY, USA

<sup>2</sup>Department of Neuroscience, Baylor College of Medicine, Houston, TX, USA

<sup>3</sup>Brain and Cognitive Sciences, University of Rochester, Rochester, NY, USA

<sup>4</sup>Department of Electrical and Computer Engineering, Rice University, Houston, TX, USA

<sup>#</sup>These authors contributed equally.

1  
2  
3  
4  
5  
6  
7  
8  
9  
10

## 11 SUMMARY

12 To take the best actions, we often need to maintain and update beliefs about variables that cannot be directly  
13 observed. To understand the principles underlying such belief updates, we need tools to uncover subjects'  
14 belief dynamics from natural behaviour. We tested whether smooth eye movements could be used to infer  
15 subjects' beliefs about latent variables using a naturalistic, visuomotor navigation task. We observed eye  
16 movements that appeared to continuously track the goal location even when no visible target was present  
17 there. Accurate goal-tracking was associated with improved task performance, and inhibiting eye  
18 movements in humans impaired navigation precision. By using passive stimulus playback and manipulating  
19 stimulus reliability, we show that subjects' eye movements are likely voluntary, rather than reflexive. These  
20 results suggest that gaze dynamics play a key role in action-selection during challenging visuomotor  
21 behaviours, and may possibly serve as a window into the subject's dynamically evolving internal beliefs.

## 22 INTRODUCTION

23 Rational behaviour in the real world often requires predicting latent variables from sensory observations.  
24 Since latent variables cannot be directly observed, and since the utility of actions depends on the status of  
25 latent variables in the future, subjects must use statistical regularities in space and in time to predict them.  
26 There is a growing body of studies that not only demonstrate that humans exploit regularities in feature  
27 space (Langer and Bühlhoff, 2001; Miyazaki, 2005; Weiss et al., 2002), but also show how to infer the  
28 associated subjective priors from data (Gosselin and Schyns, 2003; Houlsby et al., 2013; Körding and  
29 Wolpert, 2004; Paninski, 2006; Smith et al., 2012; Stocker and Simoncelli, 2006; Turnham et al., 2011). In  
30 contrast, we know relatively little about how physical laws that govern the temporal dynamics of inputs are  
31 internalized and used to guide time-evolving beliefs in the absence of reliable observations (Lee et al.,  
32 2014).

33 The reasons for limited progress in understanding belief dynamics are twofold. First, psychophysics  
34 continues to be dominated by experimental paradigms in which actions are discrete (*e.g.*, binary choice) and  
35 sporadic (*e.g.*, at the end of the trial). In contrast, continuous tasks (Bonnen et al., 2015; Huk et al., 2018;  
36 Pitkow and Angelaki, 2017) provide subjects the opportunity to reveal more information about their beliefs  
37 and predictions as they unfold in time. Second, although theoretical techniques to infer latent beliefs from  
38 actions are slowly becoming available (Kumar et al., 2019; Reddy et al., 2018; Wu et al., 2018), they have  
39 yet to be successfully applied to settings in which state and action spaces are both continuous. Consequently,  
40 principled ways to reliably uncover subjects' belief dynamics from natural behaviour are still lacking.  
41 Meanwhile, a practical way to overcome this hurdle would be by covertly 'measuring' those beliefs. One  
42 candidate tool to accomplish this is eye-tracking (Spivey, 2007). Saccadic eye movements have previously  
43 been used to understand mental processes underlying a wide variety of abstract tasks such as language  
44 comprehension (Tanenhaus et al., 1995), reading (Rayner, 1998), mental imagery (Spivey and Geng, 2001),  
45 visual search (Zhang et al., 2018), and even random number generation (Loetscher et al., 2010).  
46 Furthermore, it has recently been argued that smooth-pursuit eye movements may be influenced by short-  
47 term memory (Deravet et al., 2018; Orban de Xivry et al., 2013). By formulating oculomotor pursuit to  
48 transiently occluded moving targets as an active inference process, these eye movements have been used to  
49 infer subjects' internal beliefs (Adams et al., 2012, 2015). We wanted to know whether eye movements  
50 might also reflect belief dynamics for extended periods of time under more naturalistic conditions.

51 To address this, we first designed a challenging, naturalistic visuomotor task. We created a virtual  
52 environment comprised solely of sparse optic flow cues in which subjects used a joystick to steer to a  
53 memorized target location by integrating optic flow. To successfully perform the task, subjects had to  
54 continuously update an internal estimate of the relative target location by inferring their own movements  
55 based on the sparse cues. To test whether eye movements were informative about those estimates, we  
56 recorded the gaze behaviour of humans and rhesus macaques while they performed this task. Parallel  
57 experiments in the two species allowed us to test whether the observed eye movements were evolutionarily  
58 conserved. We found that both humans and monkeys tend to follow the location of the unseen target with  
59 their gaze until they reach it. By manipulating stimulus reliability and by using stimulus playback, we

demonstrate that the eye movements are likely volitional, rather than reflexive. Furthermore, the subjects' success in tracking the target over time predicted their final behavioural accuracy. This latter result suggests that gaze dynamics reflect internal beliefs, and could help shed light on the computations that transform visual perception to action in naturalistic settings.

## RESULTS

Monkeys and humans performed a visual navigation task in which they used a joystick to steer to a cued target location in a three-dimensional virtual reality (VR) environment without allocentric reference cues (*i.e.* stable landmarks) (**Fig 1A, Methods**). At the beginning of each trial, a circular target blinked briefly at a random location within the field of view on the ground plane, and then disappeared. We gave subjects a joystick that controlled forward and angular velocities, allowing them to steer freely in two dimensions (**Fig 1B**). The subjects' goal was to steer towards the target, and stop when they believed their position fell within a circular reward zone centered on the target. They received feedback about their performance immediately at the end of each trial.

Monkeys were first trained extensively using a staircase procedure (see **Methods**) until their performance stopped improving. Here, we will focus only on their post-training behaviour. At this point, the radius of the reward zone was fixed across trials (see **Methods**) and they received feedback in the form of juice reward at the end of the trial for correctly stopping within this zone (**Fig 1C**). In contrast, human subjects received no prior training on this task. Instead, we used an adaptive feedback scheme in which the radius of the reward zone was dynamically scaled using a staircase procedure to match individual subjects' abilities (**Fig S1A**, see **Methods**). In practice, it took less than fifty trials for the performance of humans to stabilize (**Fig S1B**). Therefore, we ignored the first fifty trials collected from human subjects and focused our analyses on the remaining data.

Target locations were uniformly distributed at random over the ground plane area within the subject's field of view (**Fig 1D – left**). The stimulus was nearly identical for both species except for minor details such as the range of target distances and the duration for which the target was visible (see **Methods**). All subjects were head-fixed, and we recorded each subject's movement trajectory (**Fig 1D – middle**) as well as eye position (**Fig 1D – right**) throughout each trial.

### Behavioural performance

**Figure 1E** shows the performance of the monkeys in this task. Both radial distance (**Fig 1E - left**) and angular eccentricity (**Fig 1E - right**) of the monkeys' responses (stopping location) were highly correlated with the target location across trials ( $n = 3$  monkeys, Pearson's  $r \pm$  standard deviation, radial distance:  $0.72 \pm 0.1$ , angle:  $0.84 \pm 0.1$ ) suggesting that their behaviour was appropriate for the task. To test whether their performance was accurate, we regressed their responses against target locations. The slope of the regression was close to unity both for radial distance (mean  $\pm$  standard deviation =  $0.92 \pm 0.06$ ) and angle ( $0.98 \pm 0.1$ ) suggesting that the monkeys were nearly unbiased (**Fig 1F – green**).

We showed previously that humans are systematically biased when performing this task without feedback, and that the bias was likely due to prior expectations that make them underestimate their movement velocities (Lakshminarasimhan et al., 2018). Consistent with those findings, human subjects overshot the target in an initial block of trials in which no feedback was provided (**Fig S1C**;  $n = 5$ , mean slope  $\pm$  standard deviation, radial distance:  $1.21 \pm 0.2$ , angle:  $1.78 \pm 0.3$ ), to a degree that was proportional to target distance. With feedback, however, the same subjects quickly adapted their responses to produce nearly unbiased performance (**Fig 1F – purple**, see **Fig S1D** for individual trials; mean slope  $\pm$  standard deviation, radial distance:  $0.95 \pm 0.1$ , angle:  $1.15 \pm 0.2$ ). Notably, this improvement in performance was

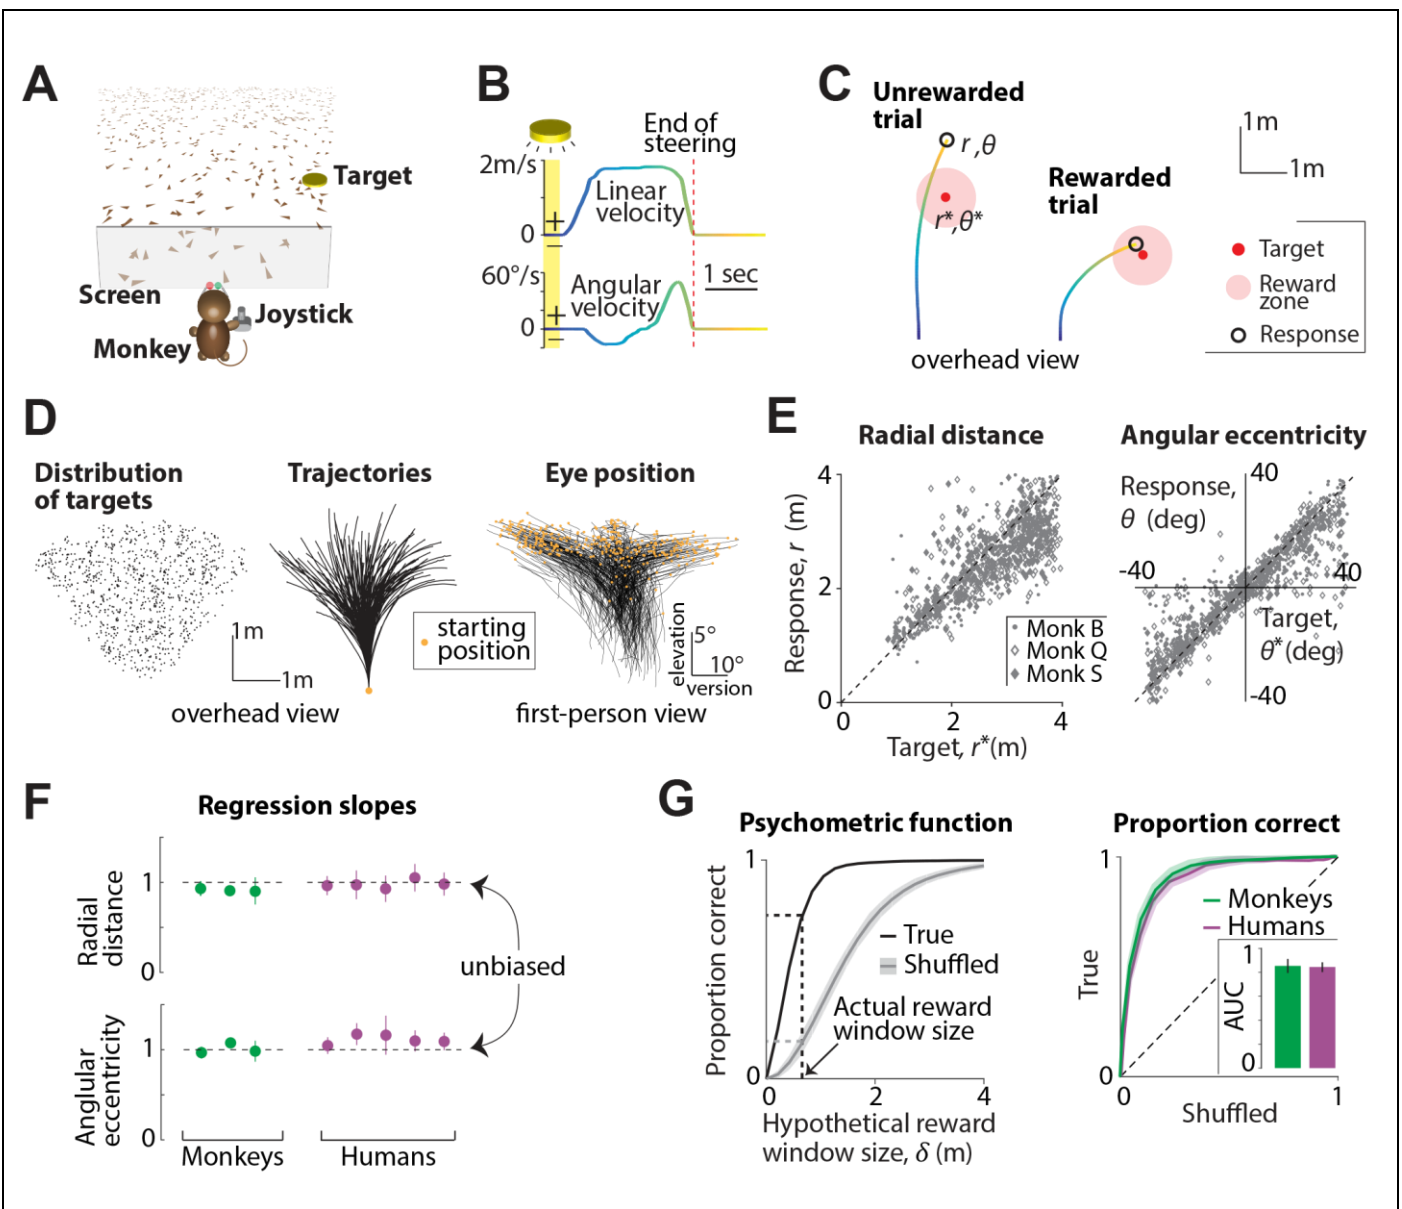

**Figure 1. Primates can navigate by integrating optic flow.** **A.** Monkeys and human subjects use a joystick to navigate to a cued target (yellow disc) using optic flow cues generated by ground plane elements (brown triangles). The ground plane elements appeared transiently at random orientations to ensure that they cannot serve as spatial or angular landmarks (**Methods**). **B.** The time-course of linear (top) and angular (bottom) velocities during one example trial. Yellow shaded region corresponds to the time period when the target was visible on the screen. Time is also coded by color. **C.** Example trials showing incorrect (left) and correct (right) responses of a monkey. Note that subjects had to stop within the reward window (0.6m for monkeys; adaptive window for humans, see **Methods**) to receive reward. **D.** *Left:* Overhead view of the spatial distribution of target positions across trials. Positions were uniformly distributed within subjects' field of view. The actual range of target distances and angles was slightly larger for human subjects (**Methods**). *Middle:* Movement trajectories of one monkey during a representative subset of trials. Orange dot denotes starting location. *Right:* First-person view of the trajectories of eye movements (average of the two eyes) during the same trials. Abscissa and ordinate show horizontal version and elevation of the eyes respectively. Orange dots represent the initial eye position (when the target was turned OFF) on each trial. **E.** *Left:* Comparison of the radial distance of the monkey's response (stopping location) against radial distance of the target across all trials. *Right:* Angular eccentricity of the response vs target angle. Black dashed lines have unity slope (unbiased performance). The subject's starting location was taken as the origin. **F.** Subjects' multiplicative biases in radial distance (top) and angular eccentricity (bottom) were quantified as the slopes of the corresponding linear regressions and plotted for individual monkeys (green) and human subjects (purple). Horizontal dashed lines denote the value of the slope that corresponds to unbiased behaviour. Error bars denote  $\pm 1$  SEM across trials. **G.** *Left:* The proportion of correct trials of one monkey for various values of hypothetical reward window size (black). Shuffled estimates are shown in gray. *Right:* ROC curves for all subjects, obtained by plotting their true proportion of correct trials (from unshuffled data) against the corresponding chance-level proportions (from shuffled data) for a range of reward windows. Shaded area denotes standard deviation across subjects. Inset shows the average area under the curve (AUC) for monkeys (green) and human subjects (purple). See also **Figure S1**.

maintained in a final block of trials in which feedback was withheld (**Fig S1E-F**; radial distance:  $1.03 \pm 0.15$ , angle:  $1.2 \pm 0.2$ ) suggesting that learning of this task was stable. To maintain consistency with monkey data, we only consider human subjects' data collected during the block of trials with feedback in the remainder of this work.

We wanted to know whether humans and monkeys had comparable accuracies. Because we used a slightly larger range of target distances for humans (see **Methods**), we could not directly compare the mean error magnitude of the subjects as it does not take differences in task difficulty into account. Instead, we used an approach that is conceptually similar to receiver operating characteristic (ROC) analysis to objectively compare the performance of monkeys and human subjects on a common scale. For each subject, we constructed a 'psychometric function' of performance as a function of hypothetical reward window size (**Fig 1G**; see **Methods**). By plotting the true psychometric function against one obtained by shuffling target locations across trials, we obtain the subject's ROC curve. Chance-level performance would correspond to an area under the ROC curve (AUC) of 0.5, while perfectly accurate responses (zero error) will yield an AUC of one. The AUCs for both monkey and human subjects were quite large and statistically indistinguishable (mean  $\pm$  standard deviation, monkeys:  $0.85 \pm 0.03$ , humans:  $0.84 \pm 0.05$ ;  $t$ -test:  $p = 0.41$ ) suggesting that they performed comparably. We emphasize that the individual visual elements comprising the ground plane were transient and could not be used as landmarks, so the performance of monkeys and human subjects in this task reflects their ability to integrate optic flow, rather than their ability to visually track a ground plane element.

### Pattern of eye movements

To understand the role of eye movements, we recorded the position of the subjects' eyes while they performed the task. **Figure 2A** shows the vertical and horizontal eye positions of one monkey during an example trial. On this trial, we noticed saccades (eye movements exceeding  $200^\circ/\text{s}$ ) before the target was turned off (henceforth called *start* of the trial) and around the time when the monkey stopped moving (*end* of steering), but not in-between. This pattern of saccade timing was evident across trials, as seen in the trial-averaged density of saccades (**Fig 2B**). Across all datasets from monkeys, the average frequency of saccades during the trial was significantly smaller than that during the inter-trial interval (mean saccade rate  $\pm$  standard deviation, during trials:  $0.5 \pm 0.3$  Hz, between trials:  $0.9 \pm 0.5$  Hz; paired  $t$ -test:  $p = 0.02$ ). We noticed a similar tendency among human subjects although the comparison was not statistically significant (**Fig S2A**; during trials:  $0.8 \pm 0.5$  Hz, between trials:  $1.4 \pm 1$  Hz;  $p = 0.11$ ). This suggests that subjects actively suppressed saccadic eye movements while steering. Moreover, the velocity of eye movements during steering was generally low, with magnitudes well below  $20^\circ/\text{s}$  both in monkeys (**Fig 2C**; mean  $\pm$  std.:  $16.2 \pm 2.1$   $^\circ/\text{s}$ ) and in humans (**Fig S2B**;  $11.4 \pm 3.2$   $^\circ/\text{s}$ ).

Because saccades were mostly confined to periods when the animal was not actively steering and subjects appeared to make slowly-varying eye movements while steering, we reasoned that they may be 'tracking' the (invisible) target with their eyes while they navigated to it. Note that as one steers towards the target location, the target would become progressively less eccentric and move downward in the visual field. Therefore, if subjects were to track the target, the magnitude of lateral version would tend towards zero and the eye elevation would become more negative with time (**Fig S3A**).

To quantitatively test whether subjects were tracking the target, we first generated ground truth theoretical predictions for the binocular position of their eyes during each trial, assuming that they maintained fixation at the center of the target throughout the trial (**Fig S3B**; **Methods – Equation 1**). We then compared this *prediction* against the *observed* eye position of the subject by expressing both quantities in terms of three standard components – lateral version, elevation and vergence (**Fig S3C**; see **Methods**).

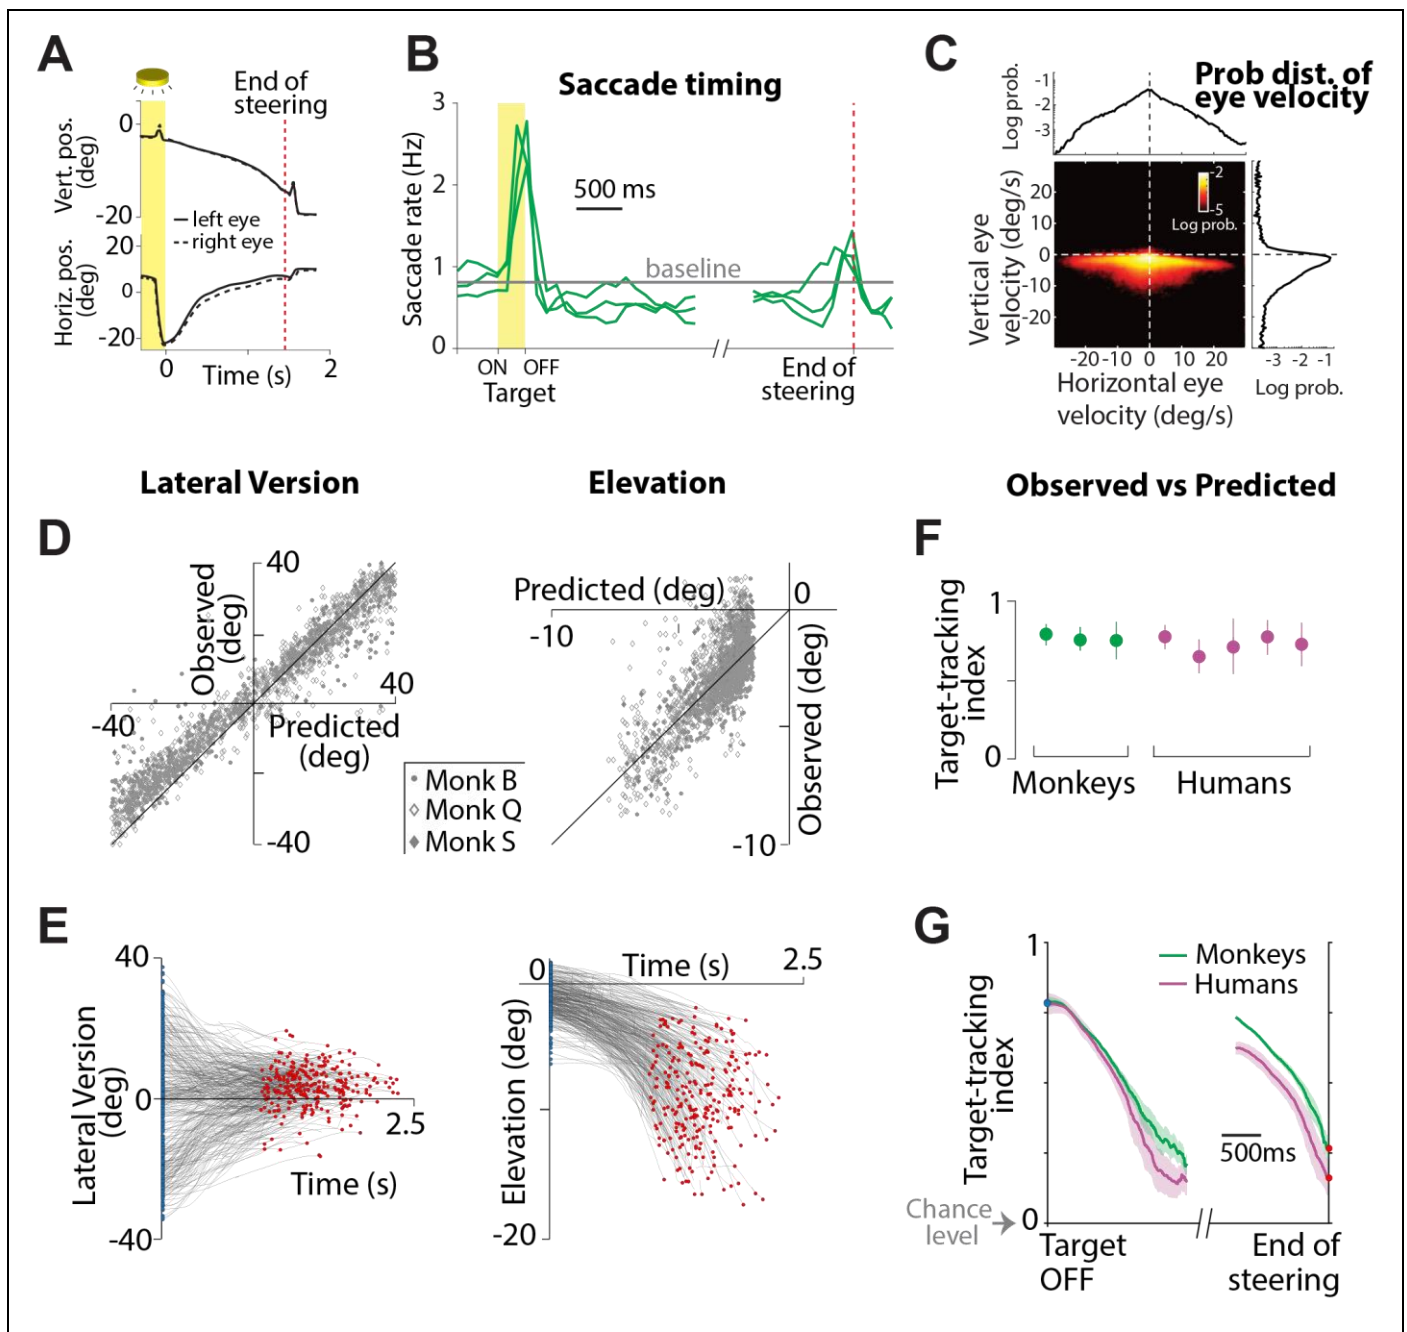

**Figure 2. Eye movement dynamics during the task.** **A.** Time-course of vertical (top) and horizontal (bottom) positions of the left (*solid*) and right (*dashed*) eyes of a monkey during one example trial (in degrees). Yellow region shows the period when a target was visible on the screen. Red dashed line corresponds to the end of steering in this trial. **B.** The time-course of the rate of saccades during the trial, averaged across all trials separately for each of the three monkeys. Trial-averaging was done by aligning trials relative to target onset (*yellow region*, before break on the x-axis) and end of steering (*red dashed line*, following the break). Grey line denotes mean saccade rate across monkeys during the period between trials. **C.** Joint probability density of the distribution over horizontal and vertical eye velocities, averaged across monkeys, while they steered towards the target. Marginals are shown in black. **D.** Comparison of the two major components (lateral version and elevation) of predicted and true eye positions in a subset of trials for all monkeys at the moment when the target was just turned OFF. **E.** Time-course of the two components (lateral version and elevation) of eye positions during a random subset of trials taken from all monkeys. Blue and red dots denote the times at which the target was turned OFF and the end of steering, respectively. **F.** Target-tracking index (defined in text) when the target turned OFF for individual monkeys (*green*) and humans (*purple*). Error bars denote  $\pm 1$  SEM obtained either by averaging across recording sessions (for monkeys) or bootstrapping (for humans). **G.** Time-course of the target-tracking index, averaged across monkeys (*green*) and humans (*purple*). Grey arrow denotes the chance level tracking-index verified by shuffling procedure. Shaded region denotes  $\pm 1$  SEM across datasets. See also **Figures S2-S7**.

149 We expect subjects' eyes to be drawn to the target when it appears on the screen. So, at the very least, the  
150 theoretical predictions should be precise at trial onset. Indeed, the model predictions were highly correlated  
151 with the measured values of lateral version (**Fig 2D – left** and **Fig S4A – left**; Pearson's  $r \pm$  standard  
152 deviation, monkeys:  $0.91 \pm 0.1$ , humans:  $0.85 \pm 0.1$ ) as well as elevation (**Fig 2D – right** and **Fig S4A –**  
153 **right**; monkeys:  $0.60 \pm 0.2$ , humans:  $0.42 \pm 0.2$ ) at the beginning of the trial. The somewhat lower  
154 correlations for the latter are understandable because it is difficult to precisely fixate at the elevations for  
155 distant targets since they subtend a smaller visual angle. We verified this effect using simulations (**Fig S5**).  
156 Next, we examined the time-course of eye movements during the trial and found a striking qualitative  
157 correspondence to the predicted dynamics (**Fig 2E, S4B**): as the trial progressed, lateral version became  
158 increasingly more concentrated around zero (**Fig S4C – left**) while eye elevation was significantly lower  
159 (**Fig S4C – right**). The correlation between predicted and observed values remained significantly greater  
160 than zero throughout the trial for both components (**Fig S4D**). This is quite remarkable because the target  
161 appeared only transiently at the beginning of the trial.

162 On the other hand, the correspondence between predicted and observed vergence was less clear. Doing this  
163 comparison for our task was challenging because about 90% of the full range of vergence angles is known to  
164 occur within gaze distances below one meter (Howard, 2012) and the predicted change in vergence is  
165 negligible for gaze distances beyond 2m (**Fig S3C – bottom right**). Only two of the three monkeys exhibited  
166 vergence values that weakly correlated with the predictions at trial onset (**Fig S6A**) and a tendency to make  
167 convergent eye movements as they approached the target (**Fig S6B**), an effect that was also absent in human  
168 subjects (**Fig S6B-D**). It is possible that this inconsistency is due to the previously documented difficulty in  
169 executing voluntary vergence movements to imagined moving targets (Erkelens et al., 1989). Moreover, this  
170 difficulty is likely exacerbated in VR where vergence eye movements must be executed without changing  
171 accommodation to maintain a clear retinal image of onscreen objects (Hoffman et al., 2008; Lamboojij et al.,  
172 2009; Shibata et al., 2011). Therefore, we did not consider the vergence component for further analyses.

173 To quantify the extent to which a subject's eyes tracked the target, we expressed the eye position as a two-  
174 dimensional vector comprised of lateral version and elevation, and computed a *target-tracking index* that  
175 measures how precisely the subjects' eyes tracked the target. Specifically, this quantity was given by the  
176 square root of the fraction of variance in the observed eye position that was explained by the prediction  
177 (**Methods – Equation 2**). An index of one implies that the subject consistently looked at the center of the  
178 target, while zero denotes lack of correspondence between target and gaze locations. The target-tracking  
179 index was quite high at trial onset (during the first 500ms) when the target had just disappeared (**Fig 2F**;  
180 mean  $\pm$  standard deviation, monkeys:  $0.73 \pm 0.05$ , humans:  $0.71 \pm 0.05$ ). Although this slowly dropped  
181 during the trial, the index at the end of the trial (during the last 500ms) remained well above zero (**Fig 2G**;  
182 mean  $\pm$  standard deviation, monkeys:  $0.35 \pm 0.1$ , humans:  $0.18 \pm 0.05$ ), implying that subjects tend to  
183 maintain gaze at the target location while they steer towards it. Alternative measures comparing observed  
184 eye positions to the predictions exhibited qualitatively similar dynamics, so the above result is robust to the  
185 precise definition of the target-tracking index used here.

186 Cross-correlograms revealed that subjects' eye positions did not systematically lead or lag the predictions  
187 based on the contemporaneous target location (**Fig S7**). This suggests that eye movements were not  
188 predicting future target locations, although the computations used to estimate the target location could still  
189 be predictive. We also found the amplitude of the vertical (but not horizontal) component of saccades during  
190 steering was correlated with the prediction error at saccade onset (*i.e.*, difference between predicted and  
191 observed eye elevation; Pearson's  $r \pm$  standard deviation, monkeys:  $0.27 \pm 0.3$ , humans:  $0.11 \pm 0.2$ ). This  
192 suggests that vertical saccades made during steering were similar to "catch-up" saccades typically observed  
193 during smooth pursuit of visible targets (Daye et al., 2014; Orban de Xivry et al., 2008). One potential  
194 reason for the lower correlations than previous studies is that catch-up saccades are typically elicited by

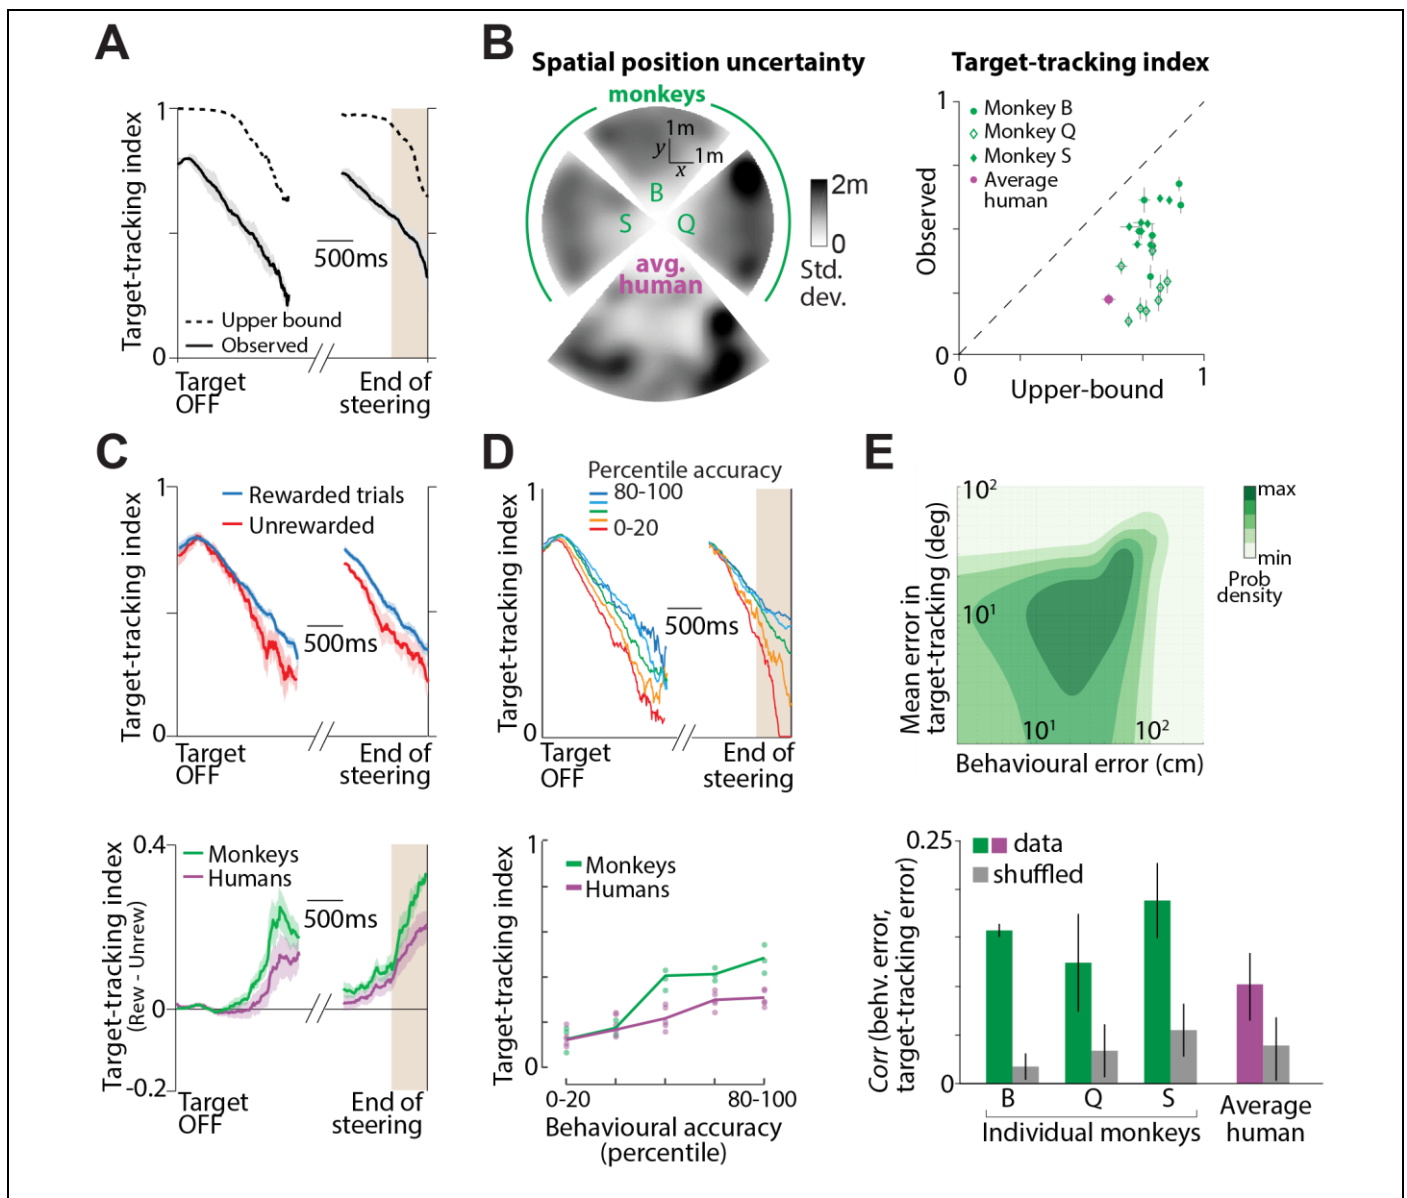

**Figure 3. Accurate target-tracking is associated with increased task performance.** **A.** Time-course of the target-tracking index for an example session computed using a monkey's actual eye movements (*black solid*) and its theoretical upper-bound (*black dashed*) determined using variability in the monkey's behavioural response (**Methods, equations 3-4**). **B. Left:** Overhead view of the spatial map showing the standard deviation of stopping positions as a function of target location for individual monkeys and the average human subject. The maps of monkey S & Q, and of the humans, have been rotated solely for visualization. All subjects shared the same range of target angles ( $\pm 40^\circ$ ) and distances (up to 4m for monkeys, 6m for humans). **Right:** Comparison of the observed target-tracking index against the corresponding theoretical upper bound (averaged over the last 500ms of the trials) across all individual datasets. Trials from human subjects were pooled together (see text for explanation). Dashed line has unity slope and error bars denote  $\pm 1$  SEM obtained by bootstrapping. **C. Top:** Time-course of the target-tracking index for one example monkey shown separately for trials in which he stopped within the reward zone (0.6m from the target, *blue*), or stopped outside it (*red*). Shaded regions denote  $\pm 1$  standard error estimated by bootstrapping. **Bottom:** The difference between tracking coefficients during rewarded and unrewarded trials for all subjects (monkeys in green, humans in purple). For human subjects, trials in which the subject's final position was within 0.6m of the center of the target were considered 'rewarded' for the purpose of classification. **D. Top:** We divided trials into five groups depending on the magnitude of the subject's error *i.e.*, final (stopping) distance to the target. Time-courses of the target-tracking index are shown for the five trial groups for one monkey (*dark blue*: most accurate; *dark red*: least accurate). **Bottom:** Average value of the target-tracking index during the final 500ms before end of steering (brown shaded region in the top panel) as a function of percentile accuracy for all individual subjects. Solid lines show average across subjects. Across all subjects (humans and monkeys), there was a significant correlation between accuracy and tracking coefficient (Pearson's  $r = 0.68$ ,  $p = 3.1 \times 10^{-5}$ ). **E. Top:** Joint distribution of the behavioural error and the target-tracking error across trials of one recording session from one monkey. **Bottom:** The mean correlation between behavioural and target-tracking errors of individual monkeys before (green) and after (gray) a shuffling procedure to control for the effects of trial difficulty (see text). Error bar denotes  $\pm 1$  SEM obtained by bootstrapping. See also **Figure S9**.



195 unexpected jumps in target velocity (de Brouwer et al., 2002), whereas motion in the task used in this study  
196 was self-generated and predominantly smooth. This might also explain why saccadic eye movements during  
197 steering were, in general, quite rare (**Fig 2B**). Therefore, we only focus on smooth eye movements in the  
198 following sections.

### 199 **Eyes convey internal beliefs about target**

200 Subjects could not have possibly been tracking the observed target location, since the target disappeared at  
201 the beginning of the trial. A plausible explanation for their pattern of eye movements is that subjects tracked  
202 the location at which they *believed* the target was present. As they integrate their movements, subjects need  
203 to continuously update their internal estimate of the relative goal location, and perhaps their eye movements  
204 reveal those estimates. If this is the case, then we should be able to better predict their eye position when  
205 their beliefs are more accurate. We tested this both across subjects and across trials within each subject.

206 To test this across subjects, we used the variability in subjects' stopping positions to first quantify the level  
207 of uncertainty in their position estimates (**Methods**). Due to the low trial count of individual human subjects,  
208 we pooled trials from all humans into a single dataset. Because uncertainty in knowing one's location should  
209 limit one's ability to visually track the target, we used the estimated uncertainties to calculate an  
210 approximate *upper bound* on the target-tracking index for each dataset (**Fig 3A, Methods – equations 3**).  
211 This upper bound serves to capture the heterogeneity in the spatial profile of uncertainty both across subjects  
212 (**Fig 3B – left**) and across sessions within each monkey (**Fig S9A**). Across all datasets, the target-tracking  
213 index observed towards the end of the trial (during the last 500ms) was weakly but significantly correlated  
214 with the theoretical upper bounds (**Fig 3B – right**; Pearson's  $r = 0.26$ ,  $p = 0.029$ ). This suggests that  
215 differences in the ability to track the target with the eyes is due, at least in part, to differences in the  
216 magnitudes of positional uncertainty between subjects.

217 We also tested whether eye movements reflect fluctuations in the subject's belief about their location across  
218 trials. Because subjects were more precise during rewarded (**Fig S9B – left**) than during unrewarded trials  
219 (**Fig S9B – middle**), we expect subjects to track the target more accurately during rewarded trials (**Fig S9B –**  
220 **right**). We computed the target-tracking index separately for the two groups of trials and found that it was  
221 indeed higher during rewarded trials (**Fig 3C – top**). The difference between the target-tracking indices  
222 during the two sets of trials grew as the trial progressed, and was significantly greater than zero at the end of  
223 the trial (**Fig 3C – bottom**; mean difference  $\pm$  standard deviation during the period shaded in grey –  
224 monkeys:  $0.19 \pm 0.05$ ,  $p = 4.8 \times 10^{-3}$ ; humans:  $0.13 \pm 0.05$ ,  $p = 3.1 \times 10^{-2}$ ; bootstrap test, 10,000  
225 bootstrap samples). In fact, when trials were stratified based on behavioural accuracy, we found that the  
226 tracking index increased with behavioural accuracy (**Fig 3D**). To more directly test whether there was a fine-  
227 grained relationship between eye movements and task performance, we estimated the correlation between  
228 the behavioural error (distance between the stopping location and the target) and the target-tracking error  
229 (mean absolute difference between the actual eye position and the theoretical prediction, see **Methods**)  
230 across trials (**Fig 3E – top**). To control for possible spurious effects of trial difficulty, we computed a  
231 shuffled estimate by subdividing the trials into groups based on initial target distance and then shuffling the  
232 trials within each group (see **Methods**). We found that the behavioural and target-tracking errors were  
233 significantly correlated across trials (**Fig 3E – bottom**, Pearson's  $r \pm$  standard deviation across all datasets –  
234 true:  $0.14 \pm 0.04$ , controlled shuffle:  $0.04 \pm 0.02$ ;  $p = 9.1 \times 10^{-3}$ , paired  $t$ -test) further reinforcing the  
235 view that subjects are tracking their internally estimated goal location with their eyes.

### 236 **Purely reflexive eye movements do not explain target-tracking behaviour**

237 In principle, the above results could also be produced by purely reflexive eye movements, driven solely by  
238 optic flow (ocular following response or OFR). For instance, if subjects' eye velocity is perfectly correlated  
239 with their perceived movement velocity, then oculomotor errors would be proportional to perceptual errors,  
240 potentially explaining the relatively poor target-tracking in erroneous trials. However, past studies have

241 shown that errors in reflexive eye movements are uncorrelated with perceptual errors (Blum and Price, 2014;  
 242 Boström and Warzecha, 2010; Glasser and Tadin, 2014; Price and Blum, 2014) suggesting that the observed  
 243 eye movements may not be entirely reflexive. Two further pieces of evidence in our own monkey data  
 244 support this.

245 First, in a subset of sessions we recorded the stimulus movie of the complete block of trials and replayed  
 246 them back to the animal at the end of the session, but with the joystick withheld (see **Methods**). All aspects  
 247 of the task structure during this replay block were identical to the initial block of trials (e.g. the monkey still  
 248 received juice reward at the end of the corresponding trials), except the animal only viewed a movie of the  
 249 stimulus rather than actively performing the task. Importantly, monkeys were still free to move their eyes. In  
 250 general, eye movements were weaker during passive viewing than during active task (**Fig S10A, B**). Across  
 251 monkeys, the magnitude of eye velocity was much smaller during passive block even though both blocks  
 252 had identical visual stimuli (**Fig S10C**). We analysed the target tracking behaviour by computing the target-  
 253 tracking index separately for the two blocks of trials. **Figure 4A** (top panel) shows the time-course of the  
 254 target-tracking index of one monkey during the both blocks of trials. In this monkey, the tracking index was  
 255 much lower during passive viewing (red vs blue). Because OFR is, by definition, involuntary and difficult to  
 256 suppress, this suggests that eye movements contributing to the high target-tracking index during active  
 257 steering must have been voluntary. Note however that the tracking index during passive viewing is poor  
 258 right from trial onset, perhaps because the monkey did not consistently look at the target initially when it  
 259 appeared on the screen. We wanted to know whether OFR dynamics, coupled with the appropriate boundary  
 260 condition (looking at the target when it initially appears) might be sufficient to give the impression that the  
 261 animal is tracking the target. We simulated this model by shifting the initial eye position on each trial of the  
 262 passive block to match the corresponding trial in the active block, a procedure that left the eye movement  
 263 dynamics unaltered (**Fig 4A – black**). The tracking index of this simulated model was substantially lower  
 264 than that observed during the active block of trials, suggesting that the target-tracking behaviour is likely to

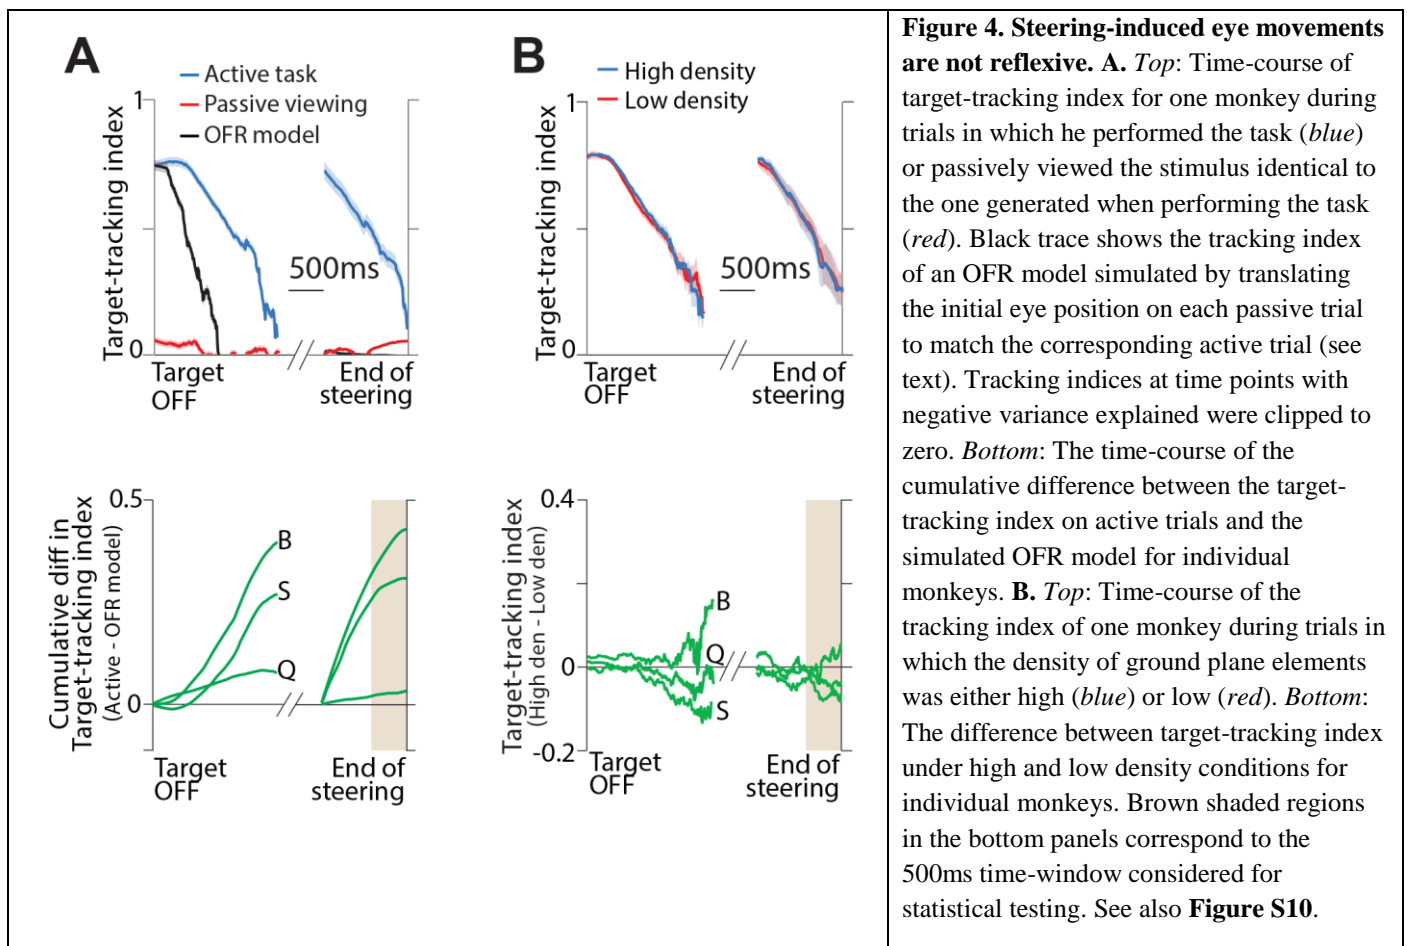

266 be a voluntary response. In all three monkeys, the target tracking during the active task was significantly  
 267 stronger than during either the passive viewing condition or the OFR model (**Fig 4A – bottom**; mean  
 268 difference  $\pm$  standard deviation during the period shaded in brown, active:  $0.27 \pm 0.1$ , passive:  $0.08 \pm 0.1$ ,  
 269 OFR model:  $0.07 \pm 0.1$ ;  $p < 0.01$ , bootstrap test). The difference between conditions was small in one  
 270 monkey (labelled ‘Q’ in **Fig 4A – bottom**; **Fig S10 – rightmost**), possibly because this animal was mentally  
 271 performing the task even during passive viewing.

272 Second, OFR is known to be sensitive to signal strength (Barthelemy et al., 2009; Quaia et al., 2012). To test  
 273 whether target tracking depends on signal strength, we manipulated stimulus reliability by randomly  
 274 interleaving trials with two different densities of ground plane elements by more than an order of magnitude  
 275 (see **Methods**). We analysed the two sets of trials separately, but found no significant difference between  
 276 the target-tracking index (**Fig 4B**; mean  $\pm$  standard deviation across subjects, low density:  $0.28 \pm 0.1$ , high  
 277 density:  $0.31 \pm 0.1$ ). Therefore, the pattern of eye movements observed during this task likely represent  
 278 volitional movements, rather than reflexive ones.

### 279 **Inhibiting eye movements worsens task performance**

280 Since eye movements were predictive of subjects’ navigational performance, we wanted to know if they  
 281 were essential for performing the task. To test this, we asked five human subjects to perform a variation of  
 282 the task in which we overlaid a cross on top of the target location and instructed them to fixate on this cross  
 283 for as long as it appeared on the screen. In half the trials (‘Eyes-moving’ condition), the fixation cross  
 284 disappeared along with the target so that subjects were free to produce eye movements as before. In the

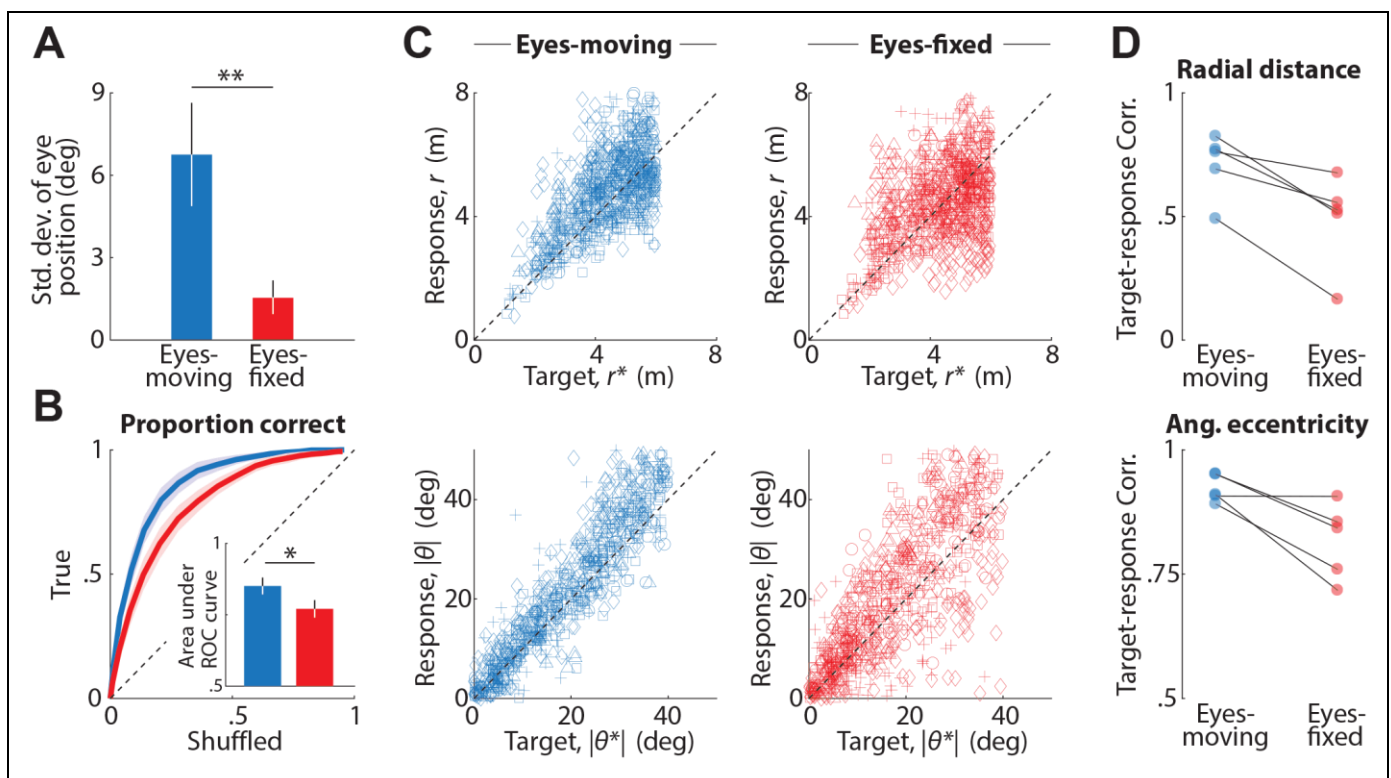

**Figure 5. Fixation affects task performance.** **A.** Trial- averaged temporal variability of subjects’ eye position, quantified by standard deviation (see **Methods**) during ‘Eyes-moving’ (blue) and ‘Eyes-fixed’ (red) trials. Error bars denote standard deviation across subjects (\*\*  $p = 1.2 \times 10^{-3}$ , paired  $t$ -test). **B.** ROC curves averaged across subjects, for trials in the ‘Eyes-moving’ (blue) and the ‘Eyes-fixed’ condition (red). Inset shows the area under the two curves. Error bars denote standard deviation across subjects (\*  $p = 2.5 \times 10^{-3}$ , paired  $t$ -test). **C. Top:** Comparison of the radial distances of the response and the target on trials in ‘Eyes-moving’ (blue) ‘Eyes-fixed’ (red) conditions. Different symbols denote different human subjects. **Bottom:** Comparison of the (absolute) angular eccentricity of the response and target under the same two conditions. **D. Top:** Pearson’s correlation coefficient between the radial distance of subjects’ response and the target under ‘Eyes-moving’ (blue) and ‘Eyes-fixed’ (red) for all individual subjects. **Bottom:** Similar comparison for the absolute angular eccentricity of target and response under the two conditions. See also **Figure S11**.

285 remaining trials ('Eyes-fixed' condition), the cross remained at the same location on the screen throughout  
286 the trial and subjects had to perform the task without moving their eyes (see **Methods**). Although we did not  
287 penalize subjects for breaking fixation, we verified offline that they maintained fixation as instructed (**Fig**  
288 **5A** and **Fig S11**). We assessed their behavioural performance by comparing the area under the ROC curve  
289 (AUC), and found that performance was significantly impaired in the 'Eyes-fixed' condition (**Fig 5B**;  $n = 5$   
290 humans, mean AUC  $\pm$  standard deviation; Eyes-moving:  $0.85 \pm 0.07$ , Eyes-fixed:  $0.77 \pm 0.07$ ,  $p = 2.5 \times$   
291  $10^{-3}$ , paired  $t$ -test). **Figure 5C** shows the responses of individual subjects. Although subjects were nearly  
292 unbiased under both conditions, the correlation between target and response locations was significantly  
293 lower in the absence of eye movements (**Fig 5D**; mean  $\pm$  standard deviation;  $Corr(r, r^*)$ , Eyes-moving:  
294  $0.71 \pm 0.1$ , Eyes-fixed:  $0.49 \pm 0.2$ ,  $p = 0.011$ , paired  $t$ -test;  $Corr(|\theta|, |\theta^*|)$ , Eyes-moving:  $0.92 \pm 0.03$ ,  
295 Eyes-fixed:  $0.82 \pm 0.1$ ,  $p = 0.035$ ). These results suggest that subjects benefit when their eyes can track the  
296 internally estimated goal location in this task.

## 297 **DISCUSSION**

298 Using a virtual visuomotor navigation task that requires continuous integration of optic flow cues, we  
299 showed that humans and monkeys execute slow eye movements while steering. By comparing these eye  
300 movements against predictions for an agent that maintained fixation at the target, we demonstrated that  
301 subjects likely tracked the imagined target location while steering towards it. Although subjects' tracking  
302 index remained significantly above chance throughout the trial, it nonetheless decreased over time. This is  
303 expected because the target disappears, so subjects cannot directly measure its true position but must instead  
304 rely on an internal estimate computed by integrating optic flow. We have previously shown that human  
305 subjects perform near-perfect integration in this task (Lakshminarasimhan et al., 2018). Nevertheless, due to  
306 noise in the integration process, the error in the internal estimate of target location on any given trial should  
307 grow over time. Consequently, even if those estimates are unbiased, their precision worsens, leading to a  
308 decrease in the target-tracking index (**Fig 3A** – dashed line). Therefore, the observed decrease in the tracking  
309 index is an inevitable consequence of noisy observations and noisy integration.

### 310 **The nature of eye movements**

311 While steering towards the target, subjects executed slow eye movements, and tended to suppress saccades.  
312 The latter is consistent with recent physiological and behavioural experiments that demonstrate that saccades  
313 have a detrimental effect on both self-motion perception (Bremmer et al., 2017) and the ability to localize  
314 targets in space (Klingenhoefer and Kregelberg, 2017). To understand the nature of these slow eye  
315 movements, we analyzed three separate components of eye position: lateral version, elevation, and vergence.  
316 In all subjects, the dynamics of the first two components were smooth and consistent with the predicted  
317 dynamics for pursuing the invisible target. In contrast, only two of the three monkeys made convergent eye  
318 movements as they approached the target location. Vergence eye movements also did not show clear  
319 dependence on the target location in human subjects. Under natural conditions, vergence eye movements are  
320 typically evoked either by binocular disparity or by a need to accommodate to blurred visual stimuli  
321 (Horwood and Riddell, 2008; Howard, 2012). Accordingly, vergence responses to imagined targets are  
322 unreliable (Erkelens et al., 1989). Moreover, accommodation demands are somewhat unnatural in VR  
323 because objects on the screen all share the same focal length. In light of these limitations, it is not very  
324 surprising that we were unable to measure vergence eye movements that varied systematically with target  
325 position in all subjects.

326 By analyzing eye movements during stimulus playback, we ruled out the possibility that the smooth  
327 dynamics correspond to pure ocular following reflex (OFR) induced by optic flow. Because these eye  
328 movements were always preceded by fixating a visible target and occurred in parallel with computations for  
329 mentally tracking that same target, they are functionally more similar to smooth-pursuit eye movements.  
330 Despite ample evidence for smooth-pursuit eye movements in the absence of foveal stimulation in humans

331 (Becker and Fuchs, 1985; Missal and Heinen, 2017; Wyatt et al., 1994) and rhesus macaques (Ilg and Thier,  
332 1999), smoothly tracking a purely imaginary object is thought to be difficult (Spering and Montagnini,  
333 2011). This is because, in the absence of dynamic information about target motion, the pursuit velocity  
334 gradually decays to zero (Barnes, 2008; Missal and Heinen, 2017). However, when the underlying model for  
335 target motion is known, subjects can use their dynamic internal representation of the target to make  
336 predictive smooth pursuit during target blanking (Adams et al., 2012; Orban de Xivry et al., 2013, 2008). In  
337 our task, the dynamics of optic flow completely determine the (relative) motion of the target and can  
338 subsequently drive eye movements. Furthermore, the flow fields were self-generated rather than simulated, a  
339 condition that has previously been shown to improve pursuit of occluded targets (Danion et al., 2017;  
340 Gauthier et al., 1988; Vercher and Gauthier, 1992). Finally, we note that a moderate contribution of OFR  
341 induced by optic flow cannot be completely excluded, so it is possible that the pattern of eye movements  
342 reported here is ultimately composed of a mixture of reflexive signals that encode velocity of self-motion  
343 and predictive signals that encode the internal estimate of relative target location.

### 344 **Possible function of tracking eye movements**

345 The experimental task was specifically designed to ensure that subjects would attempt to *mentally* track the  
346 goal location by integrating momentary sensory evidence about movement provided by optic flow. In  
347 principle, this can be accomplished without *physically* tracking the believed goal location with one's eyes.  
348 Yet we noticed a significant decline in task performance when eye movements were suppressed. This is  
349 consistent with previous results that demonstrated that real-world driving performance is impaired when eye  
350 movements are constrained (Wilson et al., 2008). Although this does not demonstrate a need to make  
351 tracking eye movements, it suggests that eye movements play an important role in neural computations for  
352 navigation. Indirect evidence of a role for slow eye movements in visually-guided navigation comes from a  
353 recent study of path integration, in which subjects used a joystick to reproduce previously-experienced self-  
354 motion (Churan et al., 2018). Eye movements during the reproduction phase were similar to those during  
355 initial exposure even when optic flow was removed. This suggested that eye movements constitute a form of  
356 mental imagery that, if suppressed, hampered memory retrieval (Johansson and Johansson, 2014; Johansson  
357 et al., 2012). Our findings extend this to naturalistic settings and argue that eye movements have a more  
358 dynamic role in path integration. The precise computational advantage of the specific eye movement  
359 dynamics observed in our task is unclear. Below, we propose two potential theories.

360 One possibility is that eye movements directed towards the intended goal location stabilizes the mental  
361 image of the goal, and could reduce the computational complexity of estimating self-motion from optic flow  
362 similar to the effect of foveal image stabilization (Lappe et al., 1999; Longuet-Higgins and Prazdny, 1980;  
363 Perrone and Stone, 1994; Sandini and Tistarelli, 1990; Sandini et al., 1986). Normative mathematical  
364 theories posit that maintaining gaze at a point on the intended path can greatly simplify the problem of  
365 exploiting optic flow (Glennester et al., 2001; Kim and Turvey, 1999; Wann and Swapp, 2000). Therefore,  
366 the eye movements reported here may constitute a closed-loop visuomotor process in which subjects  
367 integrate sense data (optic flow) to dynamically update their beliefs about the relative goal location, and in  
368 turn, use them to guide future eye movements in order to acquire new sense data in a computationally useful  
369 format. In this view, eye movements primarily aid optic flow processing.

370 Alternatively, the observed eye movements might simply be an embodiment of subjects' dynamically  
371 evolving internal beliefs about the goal. Humans have a well-documented tendency for externalizing their  
372 internal representations (Barsalou, 2008; Spivey, 2007), with eye movements sometimes employed as a  
373 pointing device to visible as well as invisible objects, much like one's index finger (Ballard et al., 1995,  
374 1997; Spivey and Geng, 2001). By allowing dynamic beliefs about the relative target location to  
375 continuously modulate eye movements in this task, the brain could piggyback on the oculomotor circuit and  
376 reduce the computational burden on working memory. Consistent with this interpretation, there is

377 overwhelming evidence for decision-related responses in primate oculomotor brain areas (de Lafuente et al.,  
378 2015; Shadlen and Newsome, 1996), and such responses are thought to drive eye movements (Joo et al.,  
379 2016). Therefore, in this view, primates use gaze as an affordance to efficiently update and store the output  
380 of integrating optic flow.

381 Although the above accounts are not mutually exclusive, simultaneously recording the neural activity from  
382 the primate sensory, oculomotor, and decision areas during this task might shed light on the dominant role of  
383 eye movements and how they link perception and action. Either way, regardless of the mechanism  
384 underlying these eye movements, the paradigm used here offers a useful approach to directly readout  
385 dynamical internal beliefs in real-time, simply by tracking subjects' eyes.

## 386 METHODS

### 387 Subjects

388 Three rhesus macaques (all male, 7-8 yrs. old) and ten human subjects (six males, all adults in the age group  
389 18-32 yrs.) participated in the experiments. All but one subject were unaware of the purpose of the study.  
390 All surgeries and experimental procedures were approved by the Institutional Review Board at Baylor  
391 College of Medicine, and were in accordance with National Institutes of Health guidelines. All human  
392 subjects signed an approved consent form. In the following sections, the term subject is used to denote both  
393 monkey and human subjects, unless specified otherwise or implied by the context.

### 394 Experimental setup

395 Monkeys were chronically implanted with a lightweight polyacetal ring for head restraint, and scleral coils  
396 for monitoring eye movements (CNC Engineering, Seattle WA, USA). At the beginning of each  
397 experimental session, monkeys were head-fixed and secured in a primate chair placed on top of a platform  
398 (Kollmorgen, Radford, VA, USA). A 3-chip DLP projector (Christie Digital Mirage 2000, Cypress, CA,  
399 USA) was mounted on top of the platform and rear-projected images onto a 60 x 60 cm tangent screen that  
400 was attached to the front of the field coil frame, ~30cm in front of the monkey. The projector was capable of  
401 rendering stereoscopic images generated by an OpenGL accelerator board (Nvidia Quadro FX 3000G).

402 Human subjects wore a custom-fit thermoplastic mask (CIVCO Medical Solutions) that was screwed to the  
403 back of the chair to restrain their head. The mask was mounted with a binocular eye tracker (ISCAN Inc.) to  
404 record the position of the subjects' pupils at 60Hz. All other aspects of the setup were similar to the one used  
405 for monkeys, but with subjects seated 67.5cm in front of a  $149 \times 127 \text{ cm}^2$  (width  $\times$  height) rectangular  
406 screen. Although humans and monkeys were head-fixed, they were both free to move their eyes when  
407 performing the task, except under one experimental manipulation in humans (noted towards the end of the  
408 section below).

### 409 Behavioural Task

410 Subjects used an analog joystick (M20U9T-N82, CTI electronics) with two degrees of freedom and a  
411 circular displacement boundary to control their linear and angular speeds in a virtual environment. This  
412 virtual world comprised a ground plane whose textural elements had limited lifetime ( $\sim 250\text{ms}$ ) to avoid  
413 serving as landmarks. The ground plane was circular with a radius of 70m (near and far clipping planes at  
414 5cm and 4000cm respectively), with the subject positioned at its center at the beginning of each trial. Each  
415 texture element was an isosceles triangle (base  $\times$  height:  $8.5 \times 18.5 \text{ cm}^2$ ) that was randomly repositioned  
416 and reoriented anywhere in the arena at the end of its lifetime, making it impossible to use as a landmark.  
417 The maximum linear and angular speeds were fixed to  $v_{\max} = 2\text{ms}^{-1}$  and  $\omega_{\max} = 90^\circ/\text{s}$  respectively, and  
418 the density of the ground plane was either held fixed at  $\rho = 2.5 \text{ elements/m}^2$  or varied randomly between  
419 two values ( $\rho = 2.5 \text{ elements/m}^2$  and  $\rho = 0.1 \text{ elements/m}^2$ ) in a subset of recording sessions (see  
420 below). The stimulus was rendered as a red-green anaglyph and projected onto the screen in front of the  
421 subject's eyes. Subjects wore goggles fitted with Kodak Wratten filters (red #29 and green #61) to view the  
422 stimulus. The binocular crosstalk for the green and red channels was 1.7% and 2.3% respectively.

423 Human subjects pressed a button on the joystick to initiate each trial, and the task was to steer to a random  
424 target location that was cued briefly at the beginning of the trial (**Fig 1A**). Monkeys performed the same  
425 task, but each trial was programmed to start after a variable random delay (0.5 – 1.1s) following the end of  
426 the previous trial. The target was a circular disc of radius 20cm whose luminance was matched to the texture  
427 elements. It appeared at a random location between  $\theta = \pm 40^\circ$  of visual angle at a distance of  $r = 0.7 - 4\text{m}$   
428 (up to 6m for human subjects) relative the subject at the beginning of the trial. For human subjects, the  
429 target disappeared after one second, which was a cue for the subject to start steering, and the joystick

430 controller was activated. In the case of monkeys, the target only appeared on the screen for 300ms, and the  
431 joystick was always active.

432 Monkeys typically performed two blocks of ~750 trials in each experimental session, and received feedback  
433 at the end of each trial. Monkeys performed a total of ~6,000 trials (4 sessions) each. Eye tracking was  
434 performed either using scleral coils (monkey Q & B) or a head-mounted eye tracker (monkey S). In one of  
435 the above recording sessions in each monkey, we saved the stimulus movie and replayed them to the animal  
436 at the end of the block. Both the visual stimulus and the schedule of rewards during this replay block were  
437 identical to the active navigation block, with the only difference being that the joystick was withheld and  
438 monkeys passively viewed the stimulus. Furthermore, a subset of the recording sessions (two sessions in  
439 each monkey) contained two randomly interleaved sets of trials that differed in terms of the density of optic  
440 flow ( $\rho = 0.1$  elements/m<sup>2</sup> and  $\rho = 2.5$  elements/m<sup>2</sup>).

441 Of the ten human subjects, five subjects performed a total of 600 trials spread equally across three blocks.  
442 The blocks were identical in all respects, except no feedback was provided at the end of the trials in the first  
443 and third blocks. The purpose of using this block structure was to study how feedback affected learning in  
444 humans. Although data collected in the absence of feedback (first and last blocks) are briefly described in  
445 **Fig. S1**, the key results of the paper are based only on data collected during the intermittent block with  
446 feedback. Furthermore, during the block with feedback, the performance of human subjects typically  
447 stabilized within fifty trials (**Fig. S1B**). Because we wanted to ensure that the performance was stable during  
448 the course of testing, we ignored the first fifty trials of this block for all our analysis (**Figs 1-3**). The  
449 remaining five human subjects participated in a version of the experiment that was designed to study the  
450 effect of inhibiting eye movements on task performance (**Fig 5**). These subjects first performed a block of  
451 fifty trials with feedback to allow their performance to stabilize. Following this pre-training block, they  
452 performed a test block comprising 400 trials of a version of this task in which a fixation cross was overlaid  
453 on top of the target in each trial, again with feedback. In a random subset of trials (50%), this fixation cross  
454 remained on the screen even after the target disappeared and subjects were instructed to maintain fixation on  
455 the cross while steering to the target. The location of the cross remained fixed in screen coordinates and thus  
456 carried no dynamic information about stimulus location.

## 457 **Feedback**

458 Monkeys received binary feedback at the end of each trial. They received a drop of juice if, after stopping,  
459 they were within 0.6m away from the center of the target. No juice was provided otherwise. The fixed  
460 reward boundary of 0.6m was determined using a staircase procedure prior to the experiment to ensure that  
461 monkeys received reward in approximately two-thirds of the trials.

462 Human subjects received a somewhat richer, adaptive feedback in the form of a bullseye pattern that  
463 appeared on the ground at the end of steering. The bullseye was centered on the target, with the innermost  
464 region having the highest luminance. The pattern comprised of five zones (**Fig S1A**), and the radii of the  
465 rings were continuously scaled (up or down by 5%) during the experiment using a 1-up 2-down staircase  
466 procedure. Additionally, an arrowhead pointing to the target also appeared on the ground in front of the  
467 subjects, colored green or red depending on whether the subject's stopping position was inside or outside the  
468 reward boundary. The adaptive feedback procedure ensured that human subjects, like monkeys, stopped  
469 within the reward boundary in roughly two-thirds of the trials. Unlike monkeys, human subjects did not  
470 receive juice at the end of each successful trial, but instead received monetary compensation that was  
471 commensurate with their performance.

## 472 **Stimulus and Data acquisition**

473 All stimuli were generated and rendered using C++ Open Graphics Library (OpenGL) by continuously  
474 repositioning the camera based on joystick inputs to update the visual scene at 60 Hz. The camera was



475 positioned at a height of 1m above the ground plane (10cm for monkeys). Spike2 software (Power 1401  
476 MkII data acquisition system from Cambridge Electronic Design Ltd.) was used to record and store the  
477 target location ( $r^*, \theta^*$ ), subject's position ( $r, \theta$ ), horizontal positions of left and right eyes ( $\alpha_l$  and  $\alpha_r$ ),  
478 vertical eye positions ( $\beta_l$  and  $\beta_r$ ) and all event markers for offline analysis at a sampling rate of  $833 \frac{1}{3}$  Hz.

### 479 **Model predicted eye position**

480 To test whether subjects' eyes tracked the location of the (invisible) target, we generated predictions for  
481 subjects' instantaneous eye positions by assuming that they maintained fixation at the center of the target.  
482  $(x_t, y_t, z_t)$  denotes the location of the target relative to the mid-point of the subject's eyes at time  $t$ . The  
483 *mean* predicted lateral displacement (relative to fixating at the point  $(0, \infty, 0)$ ) of the left and right eyes ( $\bar{\alpha}_l$   
484 and  $\bar{\alpha}_r$ ) are geometrically related to the target location and the inter-ocular distance ( $2\Delta$ ) as (**Figs S3B**):

$$\bar{\alpha}_l(t) = \tan^{-1}\left(\frac{x_t + \Delta}{\sqrt{y_t^2 + z_t^2}}\right) ; \quad \bar{\alpha}_r(t) = \tan^{-1}\left(\frac{x_t - \Delta}{\sqrt{y_t^2 + z_t^2}}\right) \quad (1.1)$$

485 Likewise, the vertical displacement of the two eyes ( $\bar{\beta}_l$  and  $\bar{\beta}_r$ ) should be:

$$\bar{\beta}_l(t) = \tan^{-1}\left(\frac{z_t}{\sqrt{y_t^2 + (x_t + \Delta)^2}}\right) ; \quad \bar{\beta}_r(t) = \tan^{-1}\left(\frac{z_t}{\sqrt{y_t^2 + (x_t - \Delta)^2}}\right) \quad (1.2)$$

486 Note that  $z_t$  is determined entirely by the camera height and hence time-invariant. In contrast,  $x_t$  and  $y_t$   
487 change continuously as the subject steers to the target, and are both equal to zero in the special case when  
488 the subject's location coincides with the center of the target. The predicted eye positions also have *variances*  
489 associated with them, which we derive in a later section (**equation 4**).

### 490 **Data Analysis**

491 Customised MATLAB code was written to analyse data and to fit models. Depending on the quantity  
492 estimated, we report statistical dispersions either using 95% confidence interval, standard deviation, or  
493 standard error in the mean. The specific dispersion measure is identified in the portion of the text  
494 accompanying the estimates. For error bars in figures, we provide this information in the caption of the  
495 corresponding figure. We report exact  $p$ -values for all statistical tests, and describe the outcome as  
496 significant if  $p < 0.05$ .

### 497 **Bias estimation**

498 We regressed (with an intercept term) each subject's response positions ( $r, \theta$ ) against target positions  
499 ( $r^*, \theta^*$ ) separately for the radial ( $r$  vs  $r^*$ ) and angular ( $\theta$  vs  $\theta^*$ ) co-ordinates, and the radial and angular  
500 multiplicative biases were quantified as the slope of the respective regressions (**Fig 1F**). The intercept terms  
501 of the regression models denote additive bias. For each subject, we estimated the 95% confidence intervals  
502 for the biases by bootstrapping.

### 503 **Psychometric analysis**

504 As described in the section on feedback, reward boundaries were chosen to ensure that all subjects correctly  
505 stopped within the reward zone in about two-thirds of the trials. However, the precise radius of these  
506 boundaries varied across human subjects, as well as between humans and monkeys. To objectively compare  
507 the performance of different subjects on a common scale, we performed ROC analysis as follows. For each  
508 subject, we first constructed a psychometric function by calculating the proportion of correct trials as a  
509 function of (hypothetical) reward boundary (**Fig 1G**). In keeping with the range of target distances used for  
510 the two species, we varied the reward boundary between 0–4m for monkeys and 0–6m for human subjects.  
511 Whereas an infinitesimally small boundary will result in all trials being classified as incorrect, a large

512 enough reward boundary will yield near-perfect accuracy. To define a chance-level psychometric function,  
513 we repeated the above procedure but now by shuffling the target locations across trials, thereby destroying  
514 the relationship between target and response locations. Finally, we obtained the ROC curve by plotting the  
515 proportion of correct trials in the original dataset (true positives) against the shuffled dataset (false positives)  
516 for each value of hypothetical reward boundary. We used the area under this ROC curve to obtain an  
517 accuracy measure that was independent of the reward boundary used for various subject.

### 518 **Characterizing eye position**

519 For convenience, we express the subject's *actual* eye position using the following three standard degrees of  
520 freedom: (i) Conjunctive horizontal movement of the two eyes or 'lateral version' quantified here as the  
521 mean lateral position of the two eyes,  $\alpha = (\alpha_l + \alpha_r)/2$ , (ii) Conjunctive vertical movement of the two eyes  
522 or 'elevation' quantified here as  $\beta = (\beta_l + \beta_r)/2$ , (iii) Disjunctive horizontal eye movements or 'vergence'  
523 quantified here as  $\gamma = (\alpha_l - \alpha_r)/2$ . Disjunctive eye movements along the vertical direction (vertical  
524 vergence) were an order of magnitude smaller than the precision of our measurements, and therefore we  
525 ignore them in all our analyses. We also transformed the *predicted* eye positions given by **Equation 1**  
526 into the above three degrees of freedom using analogous definitions to obtain  $\bar{\alpha}$ ,  $\bar{\beta}$ , and  $\bar{\gamma}$ .

### 527 **Saccade detection and pre-processing**

528 We estimated the instantaneous speed of eye movements as  $(\dot{\alpha}^2 + \dot{\beta}^2)^{1/2}$  where  $\alpha$  and  $\beta$  denote lateral  
529 version and elevation respectively (as defined above), and a dot denotes a time derivative. Saccades were  
530 detected by identifying the time points at which the speed of eye movements crossed a threshold of 200°/s  
531 from below (a threshold of 50°/s yielded similar results). Although saccades were mostly confined to periods  
532 immediately following target onset and end of steering (**Fig 2B**), we removed a period of 100ms  
533 immediately following the onset of saccades for visualizing the time-course of eye movements during the  
534 trial (**Fig 2E**) and for all subsequent temporal analyses described below. We verified that this procedure had  
535 minimal effect on the results. In approximately 10% of the trials in monkeys and ~30% in human subjects,  
536 the subject travelled beyond the target. The predicted eye positions towards the end of these trials were  
537 outside the range that was physically possible. Therefore, we removed time points at which any of the four  
538 predicted components of eye movements in **Equation 1** exceeded 60° before further analysis. Such time  
539 points constituted less than 3% of the dataset, and including them did not qualitatively alter the results.

### 540 **Comparing predicted and observed eye positions**

541 Let  $\boldsymbol{\varphi}_t = (\alpha_t, \beta_t)$  and  $\bar{\boldsymbol{\varphi}}_t = (\bar{\alpha}_t, \bar{\beta}_t)$  denote the observed and mean predicted eye positions respectively at  
542 time  $t$ . For each subject, we computed the square root of the fraction of variance in their eye movements  
543 explained by the predictions:

$$\rho_t = \sqrt{1 - \frac{\langle \|\boldsymbol{\varphi}_t - \bar{\boldsymbol{\varphi}}_t\|_2^2 \rangle}{\langle \|\boldsymbol{\varphi}_t - \bar{\boldsymbol{\varphi}}_t\|_2^2 \rangle}} \quad (2)$$

544 where  $\|\cdot\|_2$  denotes the  $L_2$  norm,  $\langle \cdot \rangle$  denotes expectation across trials, and  $\bar{\boldsymbol{\varphi}}_t$  denotes the mean observed eye  
545 position across trials at time  $t$ . Because the predictions are based on a model that assumes subjects' eyes  
546 track the center of the target, we call  $\rho$  the '*target-tracking index*', or simply '*tracking-index*'. A value of 1  
547 corresponds to perfect prediction while zero implies that the predictions were no better than the mean  
548 observation. In principle, the deviation from the predictions can be larger than the intrinsic variability of the  
549 data. We clipped the target-tracking index to zero whenever this happened. Since trial durations were  
550 variable, we aligned all trials relative to the time at which the target was turned off ( $t = 0$ ) to estimate the  
551 time course of tracking coefficient  $\rho_t^{\text{start}} \forall t \in [0, 1.8s]$ .  $\rho_0^{\text{start}}$  corresponds to the similarity between  
552 observed and predicted eye position at the moment when the target was turned off (**Fig 2F**). We also

553 computed the tracking coefficient by aligning trials with respect to the end of steering ( $t = T$ ) to estimate  
 554  $\rho_t^{\text{stop}} \forall t \in [-1.2s, 0]$ . To visualize the time-course of the tracking coefficient, we plot both  $\rho_t^{\text{start}}$  and  
 555  $\rho_t^{\text{stop}}$  with a break in the  $x$ -axis (**Fig 2G, 3 & 4**). To assess standard errors and statistical significance of  
 556 differences between tracking coefficients from pairs of conditions (e.g. rewarded vs unrewarded trials), we  
 557 used a bootstrap test with 10,000 bootstrap samples.

### 558 Estimation of position uncertainty

559 We estimated subjects' position uncertainty by binning the 2D space into  $10 \times 10 \text{ cm}^2$  bins. For each bin, we  
 560 computed the variance in the subject's stopping position across trials in which targets fell in that bin. The  
 561 resulting spatial map of variability was then convolved with a two-dimensional isotropic Gaussian kernel of  
 562 width 40cm (equal to the diameter of the target) to yield a smooth estimate of variability as a function of  
 563 space (**Fig 3B – left**). Because subjects aimed to stop on the target, variability in their stopping position can  
 564 be interpreted as the uncertainty in subjects' posterior estimate about their own position.

### 565 Deriving an upper bound on the target-tracking index

566 Once the target disappears, subjects no longer get to directly observe it. To reach the target location, they  
 567 update their beliefs about the relative location of the target by integrating their self-motion, which in turn  
 568 must be estimated from the observed optic flow. Even if those beliefs are accurate on average, the  
 569 uncertainty in believed target location will grow over time on any given trial due to noise both in the  
 570 observations and in the integration process. Consequently, the degree to which subjects' eyes can track the  
 571 target (quantified by the tracking index,  $\rho$ ) should decrease over time. Using the variability in subjects'  
 572 stopping positions to model their uncertainty in their believed location (see section above), we derived an  
 573 approximate upper-bound on the temporal dynamics of the tracking-index  $\rho_t$  at time  $t$  assuming inter-ocular  
 574 distance  $\Delta \approx 0$ :

$$\rho_t \leq \sqrt{1 - \frac{\langle \|\hat{\Phi}_t - \bar{\Phi}_t\|_2^2 \rangle}{\langle \|\Phi_t - \bar{\Phi}_t\|_2^2 \rangle}} \quad (3)$$

575 where  $\bar{\Phi}_t = \langle \hat{\Phi}_t \rangle$  denotes the mean predicted eye position at time  $t$ . Note that this represents an upper-  
 576 bound insofar as the variability in subject's stopping positions stems entirely from uncertainty in their  
 577 believed location. To derive this approximate bound, we first used the first-order Taylor series  
 578 approximation of equation (1) to express the variance of the predicted eye position ( $\hat{\alpha}_t, \hat{\beta}_t$ ) in terms of the  
 579 variance of the relative target position ( $x_t, y_t, z_t$ ) as:  $\text{Var}(\hat{\alpha}_t) = (\partial f / \partial x)^2 \text{Var}(x_t) + (\partial f / \partial y)^2 \text{Var}(y_t)$   
 580 and  $\text{Var}(\hat{\beta}_t) = (\partial g / \partial x)^2 \text{Var}(x_t) + (\partial g / \partial y)^2 \text{Var}(y_t)$ , where  $f(x_t, y_t, z_t) = \tan^{-1}(\sqrt{y_t^2 + z_t^2} / x_t)$  and  
 581  $g(x_t, y_t, z_t) = \tan^{-1}(z_t / \sqrt{y_t^2 + x_t^2})$  from equation (1), and we have used the fact that  $\text{Var}(z_t) = 0$  because  
 582 there is no motion component perpendicular to the ground plane. Substituting the derivatives, we get:

$$\text{Var}(\hat{\alpha}_t) = \frac{(y_t^2 + z_t^2)}{(x_t^2 + y_t^2 + z_t^2)^2} \text{Var}(x_t) + \frac{x_t^2 y_t^2}{(x_t^2 + y_t^2 + z_t^2)^2 (y_t^2 + z_t^2)} \text{Var}(y_t) \quad (4.1)$$

$$\text{Var}(\hat{\beta}_t) = \frac{z_t^2}{(x_t^2 + y_t^2 + z_t^2)^2 (x_t^2 + y_t^2)} (x_t^2 \text{Var}(x_t) + y_t^2 \text{Var}(y_t)) \quad (4.2)$$

583 The above equations are based on first-order Taylor series approximation and hold as long as the higher-  
 584 order terms are relatively small (**Fig S8**). Although we cannot not directly measure  $\text{Var}(x_t)$  and  $\text{Var}(y_t)$ , we  
 585 could estimate them from the data (see previous section) and use it to determine the variability in predicted  
 586 eye positions given by **equation (4)**. Variability in the predictions then implies a lower bound in the mean

587 squared error achievable by any observation  $\boldsymbol{\varphi}_t$ :  $\|\boldsymbol{\varphi}_t - \hat{\boldsymbol{\varphi}}_t\|_2^2 \geq \|\hat{\boldsymbol{\varphi}}_t - \bar{\boldsymbol{\varphi}}_t\|_2^2$ . Substituting this in (2), we  
588 obtain an upper bound on the tracking-index given by **equation (3)**. Note that, in deriving this approximate  
589 upper-bound, we ignored the noise in generating an eye movement to an intended location (process noise).  
590 So in principle, it is possible to derive a tighter bound by incorporating it. Note that as subjects approach the  
591 target,  $x_t$  and  $y_t$  approach zero, whereas the uncertainty grows so both  $\text{Var}(x_t)$  and  $\text{Var}(y_t)$  increase.  
592 Together, this leads to an increase in the variance of the predicted eye positions (**equation 4**) and  
593 consequently, a gradual decrease in the fraction of explainable variance over time (**equation 3**).

### 594 **Comparing behavioural and target-tracking errors**

595 To test whether poor target-tracking was associated with poor behavioural accuracy, we estimated the  
596 correlation between behavioural and target-tracking errors across trials of individual recording sessions.  
597 Behavioural error was given by the Euclidean distance between the target location and the subject's  
598 response (stopping location) on individual trials, while the target-tracking error was given by the Euclidean  
599 distance between actual and predicted eye position, averaged over the entire time period of the trial, except  
600 for the last 300ms (as the predictions typically broke down when the subject was too close to the target).  
601 Because trial difficulty could affect both errors thereby inducing spurious correlations, we estimated the null  
602 distribution of correlations using a shuffling procedure where we grouped the trials from each recording  
603 session into ten quantiles based on target distance and shuffling only trials within the same group. The  
604 results were quite robust to the number of quantiles.

### 605 **Assessing performance in the fixation task**

606 To assess the behavioural effect of inhibiting eye movements, we compared human subjects' performance  
607 across 'eyes-moving' and 'eyes-fixed' trials. Because we did not control for fixation breaks that happened in  
608 the 'eyes-fixed' condition during the experiment, we identified and removed such trials offline. Specifically,  
609 we removed the trials in which the temporal standard deviation ( $\sigma$ ) of subject's eye position during the trial  
610 (*i.e.* from the time when the target disappeared until the end of steering) exceeded  $3^\circ$  (roughly half-width of  
611 the fixation cross), from our analysis (~10% of the fixation trials across all subjects). The standard deviation  
612 was quantified as  $\sigma = \sqrt{\sigma^2(\alpha) + \sigma^2(\beta)}$  where  $\sigma(\alpha)$  and  $\sigma(\beta)$  denote the temporal standard deviation of  
613 lateral version and elevation respectively. To evaluate the role of eye movements, we compared subjects'  
614 performance in the fixation trials ('eyes-fixed') with trials that did not require fixation ('eyes-moving'). For  
615 both sets of trials, we computed ROC curves for distinguishing 'rewarded' and 'unrewarded' trials (see  
616 section 'psychometric analysis' above) and used a paired *t*-test to test whether the mean area under the  
617 curves were different. We also computed the correlation between target and response locations and then  
618 used a paired *t*-test to test whether there was a significant difference between the correlation coefficients in  
619 the two sets of trials across subjects (**Fig 5D**).

### 620 **Acknowledgements**

621 We thank Samir Saidi for assisting with the human experiments, Jing Lin and Jian Chen for their help in  
622 programming the stimulus. This work was supported by the Simons Collaboration on the Global Brain, grant  
623 #324143 and NIH DC007620. G.C.D. was supported by NIH EY016178.

624

## References

- 625 Adams, R.A., Perrinet, L.U., and Friston, K. (2012). Smooth Pursuit and Visual Occlusion: Active Inference and  
626 Oculomotor Control in Schizophrenia. *PLoS One*.
- 627 Adams, R.A., Aponte, E., Marshall, L., and Friston, K.J. (2015). Active inference and oculomotor pursuit: The  
628 dynamic causal modelling of eye movements. *J. Neurosci. Methods* 242, 1–14.
- 629 Ballard, D.H., Hayhoe, M.M., and Pelz, J.B. (1995). Memory Representations in Natural Tasks. *J. Cogn. Neurosci.*
- 630 Ballard, D.H., Hayhoe, M.M., Pook, P.K., and Rao, R.P.N. (1997). Deictic codes for the embodiment of cognition.  
631 *Behav. Brain Sci.*
- 632 Barnes, G.R. (2008). Cognitive processes involved in smooth pursuit eye movements. *Brain Cogn.*
- 633 Barsalou, L.W. (2008). Grounded Cognition. *Annu. Rev. Psychol.* 59, 617–645.
- 634 Barthelemy, F. V, Fleuriet, J., and Masson, G.S. (2009). Temporal Dynamics of {2D} Motion Integration for Ocular  
635 Following in Macaque Monkeys. *J. Neurophysiol.*
- 636 Becker, W., and Fuchs, A.F. (1985). Prediction in the oculomotor system: smooth pursuit during transient  
637 disappearance of a visual target. *Exp. Brain Res.*
- 638 Blum, J., and Price, N.S.C. (2014). Reflexive tracking eye movements and motion perception: one or two neural  
639 populations? *J. Vis.*
- 640 Bonnen, K., Burge, J., Yates, J., Pillow, J., and Cormack, L.K. (2015). Continuous psychophysics: Target-tracking to  
641 measure visual sensitivity. *J. Vis.* 15, 14.
- 642 Boström, K.J., and Warzecha, A.K. (2010). Open-loop speed discrimination performance of ocular following response  
643 and perception. *Vision Res.*
- 644 Bremmer, F., Churan, J., and Lappe, M. (2017). Heading representations in primates are compressed by saccades. *Nat.*  
645 *Commun.*
- 646 de Brouwer, S., Missal, M., Barnes, G., and Lefèvre, P. (2002). Quantitative Analysis of Catch-Up Saccades During  
647 Sustained Pursuit. *J. Neurophysiol.* 87, 1772–1780.
- 648 Churan, J., Hopffgarten, A. von, and Bremmer, F. (2018). Eye movements during path integration. *Physiol. Rep.* 6,  
649 e13921.
- 650 Danion, F., Mathew, J., and Flanagan, J.R. (2017). Eye Tracking of Occluded Self-Moved Targets: Role of Haptic  
651 Feedback and Hand-Target Dynamics. *Eneuro.*
- 652 Daye, P.M., Blohm, G., and Lefevre, P. (2014). Catch-up saccades in head-unrestrained conditions reveal that saccade  
653 amplitude is corrected using an internal model of target movement. *J. Vis.* 14.
- 654 Deravet, N., Blohm, G., de Xivry, J.-J.O., and Lefèvre, P. (2018). Weighted integration of short-term memory and  
655 sensory signals in the oculomotor system. *J. Vis.* 18, 16.
- 656 Erkelens, C.J., Van der Steen, J., Steinman, R.M., and Collewijn, H. (1989). Ocular vergence under natural conditions.  
657 I. Continuous changes of target distance along the median plane. *Proc. R. Soc. B Biol. Sci.*
- 658 Gauthier, G.M., Vercher, J.L., Mussa Ivaldi, F., and Marchetti, E. (1988). Oculo-manual tracking of visual targets:  
659 control learning, coordination control and coordination model. *Exp. Brain Res.*
- 660 Glasser, D.M., and Tadin, D. (2014). Modularity in the motion system: independent oculomotor and perceptual  
661 processing of brief moving stimuli. *J. Vis.*
- 662 Glennerster, A., Hansard, M.E., and Fitzgibbon, A.W. (2001). Fixation could simplify, not complicate, the  
663 interpretation of retinal flow. *Vision Res.*
- 664 Gosselin, F., and Schyns, P.G. (2003). Superstitious perceptions reveal properties of internal representations. *Psychol.*  
665 *Sci.*
- 666 Hoffman, D.M., Girshick, A.R., Akeley, K., and Banks, M.S. (2008). Vergence–accommodation conflicts hinder  
667 visual performance and cause visual fatigue. *J. Vis.* 8.
- 668 Horwood, A.M., and Riddell, P.M. (2008). The use of cues to convergence and accommodation in naïve, uninstructed  
669 participants. *Vision Res.*
- 670 Houlshby, N.M.T., Huszár, F., Ghassemi, M.M., Orbán, G., Wolpert, D.M., and Lengyel, M. (2013). Cognitive  
671 Tomography Reveals Complex, Task-Independent Mental Representations. *Curr. Biol.*
- 672 Howard, I.P. (2012). Vergence Eye movements. In *In Perceiving in Depth*, pp. 475–548.
- 673 Huk, A., Bonnen, K., and He, B.J. (2018). Beyond trial-based paradigms: Continuous behavior, ongoing neural  
674 activity, and natural stimuli. *J. Neurosci.*
- 675 Ilg, U.J., and Thier, P. (1999). Eye movements of rhesus monkeys directed towards imaginary targets. *Vision Res.*
- 676 Johansson, R., and Johansson, M. (2014). Look Here, Eye Movements Play a Functional Role in Memory Retrieval.  
677 *Psychol. Sci.*
- 678 Johansson, R., Holsanova, J., Dewhurst, R., and Holmqvist, K. (2012). Eye movements during scene recollection have  
679 a functional role, but they are not reinstatements of those produced during encoding. *J. Exp. Psychol. Hum. Percept.*  
680 *Perform.*
- 681 Joo, S.J., Katz, L.N., and Huk, A.C. (2016). Decision-related perturbations of decision-irrelevant eye movements.  
682 *Proc. Natl. Acad. Sci.*
- 683 Kim, N.G., and Turvey, M.T. (1999). Eye Movements and a Rule for Perceiving Direction of Heading. *Ecol. Psychol.*

- 684 Klingenhoefer, S., and Krekelberg, B. (2017). Perisaccadic visual perception. *J Vis.*
- 685 Körding, K.P., and Wolpert, D.M. (2004). Bayesian integration in sensorimotor learning. *Nature.*
- 686 Kumar, A., Wu, Z., Pitkow, X., and Schrater, P. (2019). Belief dynamics extraction. *ArXiv.*
- 687 de Lafuente, V., Jazayeri, M., and Shadlen, M.N. (2015). Representation of Accumulating Evidence for a Decision in  
688 Two Parietal Areas. *J. Neurosci.*
- 689 Lakshminarasimhan, K.J., Petsalis, M., Park, H., DeAngelis, G.C., Pitkow, X., and Angelaki, D.E. (2018). A Dynamic  
690 Bayesian Observer Model Reveals Origins of Bias in Visual Path Integration. *Neuron* 99, 194–206.
- 691 Lambooij, M., IJsselsteijn, W., Fortuin, M., and Heynderickx, I. (2009). Visual Discomfort and Visual Fatigue of  
692 Stereoscopic Displays: A Review. *J. Imaging Sci. Technol.* 53.
- 693 Langer, M.S., and Bülthoff, H.H. (2001). A prior for global convexity in local shape-from-shading. *Perception.*
- 694 Lappe, M., Bremmer, F., and Van Den Berg, A. V. (1999). Perception of self-motion from visual flow. *Trends Cogn.*  
695 *Sci.* 3, 329–336.
- 696 Lee, D.D., Ortega, P.A., and Stocker, A.A. (2014). Dynamic belief state representations. *Curr. Opin. Neurobiol.*
- 697 Loetscher, T., Bockisch, C.J., Nicholls, M.E.R., and Brugger, P. (2010). Eye position predicts what number you have  
698 in mind. *Curr. Biol.*
- 699 Longuet-Higgins, H.C., and Prazdny, K. (1980). The Interpretation of a Moving Retinal Image. *Proc. R. Soc. B Biol.*  
700 *Sci.*
- 701 Missal, M., and Heinen, S.J. (2017). Stopping smooth pursuit. *Philos. Trans. R. Soc. B Biol. Sci.*
- 702 Miyazaki, M. (2005). Testing Bayesian Models of Human Coincidence Timing. *J. Neurophysiol.*
- 703 Orban de Xivry, J.-J., Coppe, S., Blohm, G., and Lefevre, P. (2013). Kalman Filtering Naturally Accounts for Visually  
704 Guided and Predictive Smooth Pursuit Dynamics. *J. Neurosci.* 33, 17301–17313.
- 705 Orban de Xivry, J.J., Missal, M., and Lefevre, P. (2008). A dynamic representation of target motion drives predictive  
706 smooth pursuit during target blanking. *J. Vis.*
- 707 Paninski, L. (2006). Nonparametric inference of prior probabilities from Bayes-optimal behavior. *Adv. Neural Inf.*  
708 *Process. Syst.*
- 709 Perrone, J.A., and Stone, L.S. (1994). A model of self-motion estimation within primate extrastriate visual cortex.  
710 *Vision Res.*
- 711 Pitkow, X., and Angelaki, D.E. (2017). Inference in the Brain: Statistics Flowing in Redundant Population Codes.  
712 *Neuron* 94, 943–953.
- 713 Price, N.S.C., and Blum, J. (2014). Motion perception correlates with volitional but not reflexive eye movements.  
714 *Neuroscience.*
- 715 Quaia, C., Sheliga, B.M., FitzGibbon, E.J., and Optican, L.M. (2012). Ocular following in humans: Spatial properties.  
716 *J. Vis.*
- 717 Rayner, K. (1998). Eye Movements in Reading and Information Processing: 20 Years of Research. *Psychol. Bull.*
- 718 Reddy, S., Dragan, A.D., and Levine, S. (2018). Where Do You Think You're Going?: Inferring Beliefs about  
719 Dynamics from Behavior. In *NeurIPS*, p.
- 720 Sandini, G., and Tistarelli, M. (1990). Active Tracking Strategy for Monocular Depth Inference Over Multiple  
721 Frames. *IEEE Trans. Pattern Anal. Mach. Intell.*
- 722 Sandini, G., Tagliasco, V., and Tistarelli, M. (1986). Analysis of object motion and camera motion in real scenes.  
723 *Proc. IEEE Conf. Robot. Autom.* 627–633.
- 724 Shadlen, M.N., and Newsome, W.T. (1996). Motion perception: seeing and deciding. *Proc. Natl. Acad. Sci.*
- 725 Shibata, T., Kim, J., Hoffman, D.M., and Banks, M.S. (2011). The zone of comfort: Predicting visual discomfort with  
726 stereo displays. *J. Vis.* 11.
- 727 Smith, M.L., Gosselin, F., and Schyns, P.G. (2012). Measuring internal representations from behavioral and brain  
728 data. *Curr. Biol.*
- 729 Spring, M., and Montagnini, A. (2011). Do we track what we see? Common versus independent processing for  
730 motion perception and smooth pursuit eye movements: A review. *Vision Res.*
- 731 Spivey, M. (2007). *The Continuity of Mind.*
- 732 Spivey, M.J., and Geng, J.J. (2001). Oculomotor mechanisms activated by imagery and memory: Eye movements to  
733 absent objects. *Psychol. Res.*
- 734 Stocker, A.A., and Simoncelli, E.P. (2006). Noise characteristics and prior expectations in human visual speed  
735 perception. *Nat. Neurosci.*
- 736 Tanenhaus, M.K., Spivey-Knowlton, M.J., Eberhard, K.M., and Sedivy, J.C. (1995). Integration of visual and  
737 linguistic information in spoken language comprehension. *Science* (80- ).
- 738 Turnham, E.J., Braun, D.A., and Wolpert, D.M. (2011). Inferring visuomotor priors for sensorimotor learning. *PLoS*  
739 *Comput. Biol.*
- 740 Vercher, J.L., and Gauthier, G.M. (1992). Oculo-manual coordination control: Ocular and manual tracking of visual  
741 targets with delayed visual feedback of the hand motion. *Exp. Brain Res.*
- 742 Wann, J.P., and Swapp, D.K. (2000). Why you should look where you are going. *Nat. Neurosci.*
- 743 Weiss, Y., Simoncelli, E.P., and Adelson, E.H. (2002). Motion illusions as optimal percepts. *Nat. Neurosci.*

- 744 Wilson, M., Chattington, M., and Marple-Horvat, D.E. (2008). Eye movements drive steering: Reduced eye  
745 movement distribution impairs steering and driving performance. *J. Mot. Behav.*
- 746 Wu, Z., Schrater, P., and Pitkow, X. (2018). Inverse POMDP : Inferring Internal Model and Latent Beliefs. In  
747 Conference on Cognitive Computational Neuroscience, p.
- 748 Wyatt, H.J., Pola, J., Fortune, B., and Posner, M. (1994). Smooth pursuit eye movements with imaginary targets  
749 defined by extrafoveal cues. *Vision Res.*
- 750 Zhang, M., Feng, J., Lim, J.H., Zhao, Q., and Kreiman, G. (2018). What am I searching for? *ArXiv 1807.11926*.  
751
